# Supplementary material for: Sensitive detection of acid phosphatase based on graphene quantum dots nanoassembly
Source: Royal Society of Chemistry journal article supplement (doi:10.1039/c6an01087c), 2016-01-01
Supplement: c6an01087c1.pdf [file c6an01087c1.pdf]

## **Supporting Information**

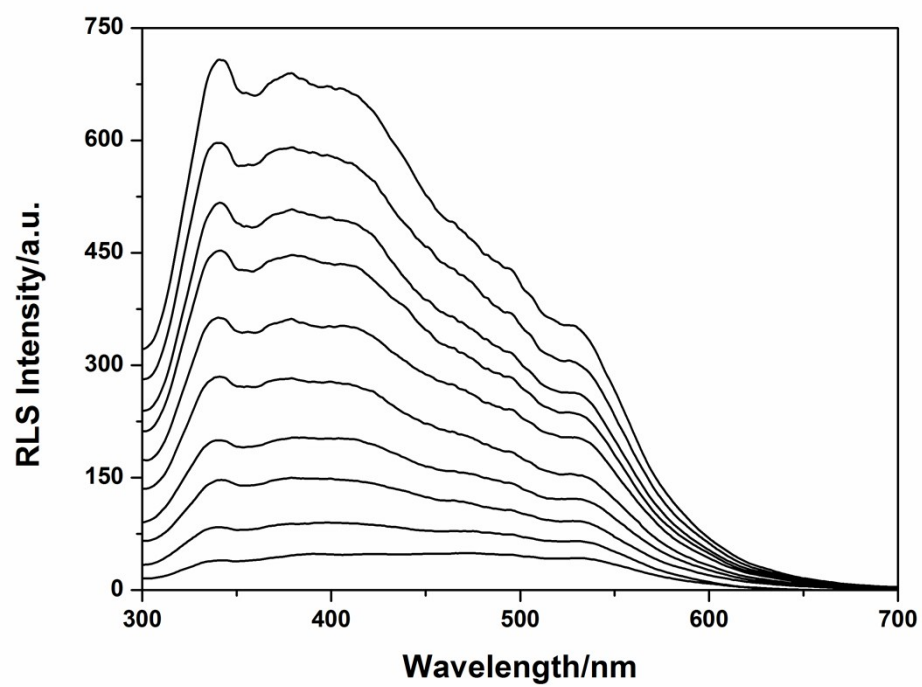

Fig. S1 The RLS spectra of GQDs in the presence of different concentrations of PDMA in the range from 0 to  $22.5 \mu\text{g mL}^{-1}$  (0, 2.5, 5, 7.5, 10, 12.5, 15, 17.5, 20 and  $22.5 \mu\text{g mL}^{-1}$ ).

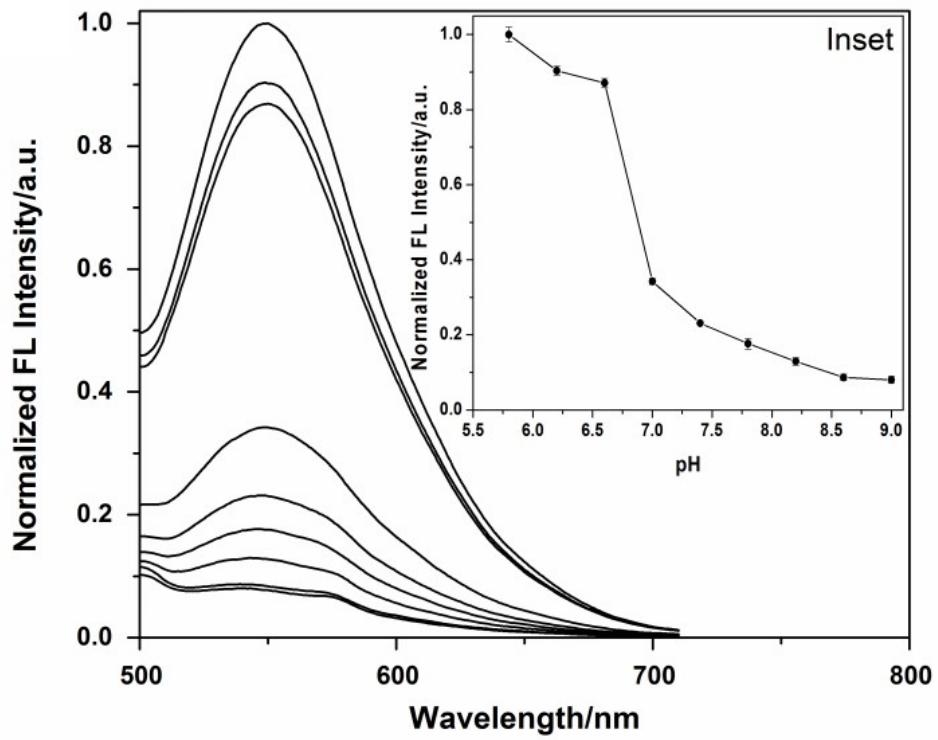

Fig. S2 The effect of pH on the fluorescence spectra of GQDs. Inset: The effect of pH on the fluorescence intensity of GQDs.

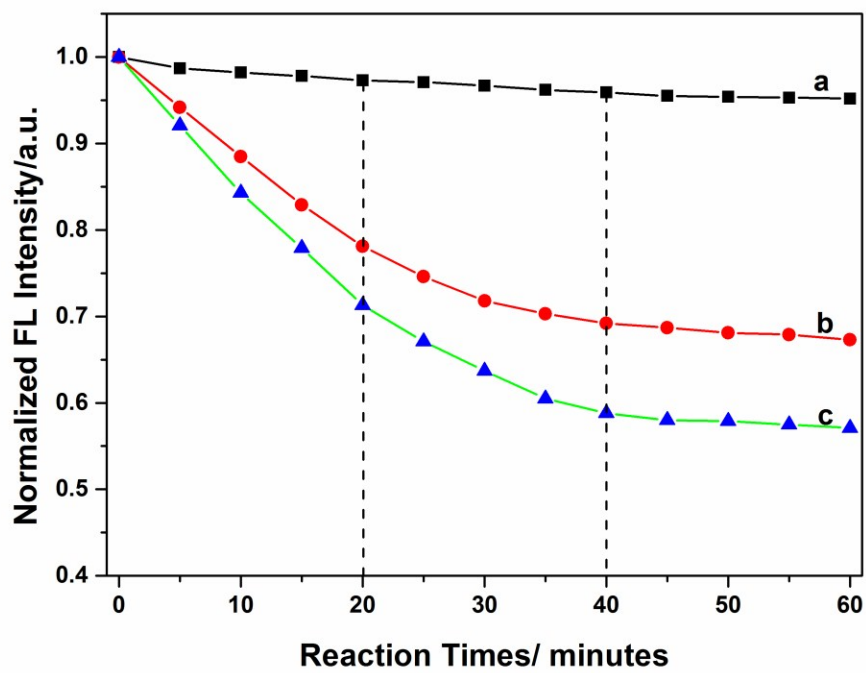

Fig. S3 The fluorescence intensity of GQDs-PDDA-( $\text{NaPO}_3$ )<sub>6</sub>-ACP system in the presence of (a)10, (b)300 and (c)750 nU/mL ACP at different incubation time.

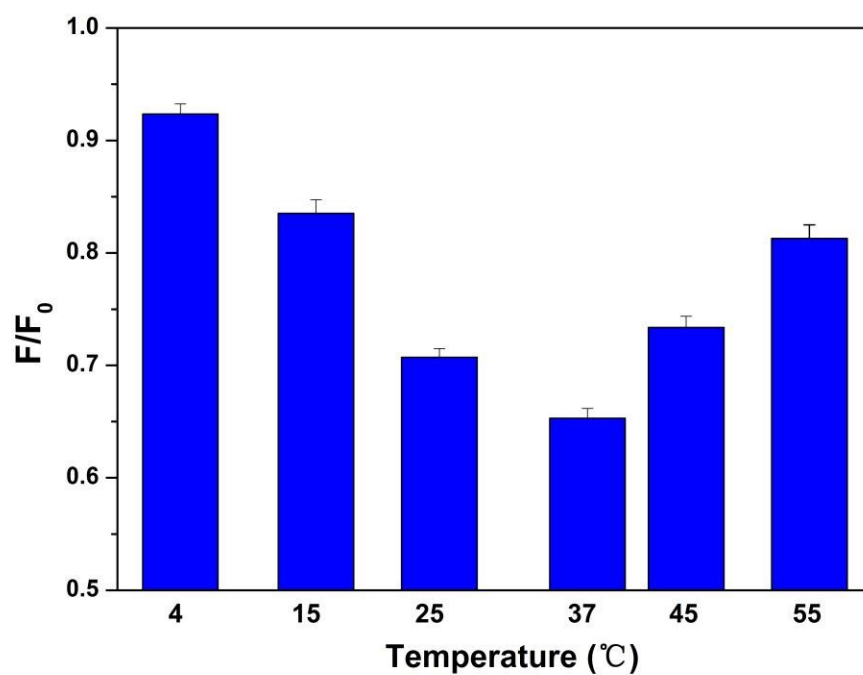

Fig. S4 Effect of incubation temperature on the fluorescence intensity ratio  $F/F_0$  of GQDs-PDDA- $(\text{NaPO}_3)_6$ -ACP system.  $F_0$  and  $F$  are the fluorescence intensities of the PDDA-GQDs- $(\text{NaPO}_3)_6$  system in absence and presence of 300 nU/mL ACP.

Table S1 The comparison of different method for the detection of ACP

| Detection method | LOD                     | Linear range                | Ref       |
|------------------|-------------------------|-----------------------------|-----------|
| Fluorometry      | 1 nM                    | 1-30 nM                     | [1]       |
| Fluorometry      | 5 $\mu\text{U mL}^{-1}$ | 5-100 $\mu\text{U mL}^{-1}$ | [5]       |
| Fluorometry      | 9 nU mL <sup>-1</sup>   | 75-1500 nU mL <sup>-1</sup> | [8]       |
| Fluorometry      | 0.18 nM                 | 0-20 nM                     | [24]      |
| Fluorometry      | 0.17 nM                 | 0-20 nM                     | [25]      |
| Fluorometry      | 12 nU mL <sup>-1</sup>  | 30-420 nU mL <sup>-1</sup>  | This work |

The ACP in [1], [24] and [25] was obtained from Sigma (USA). 1 nM, which is corresponding to 0.3-1 mU/mL.

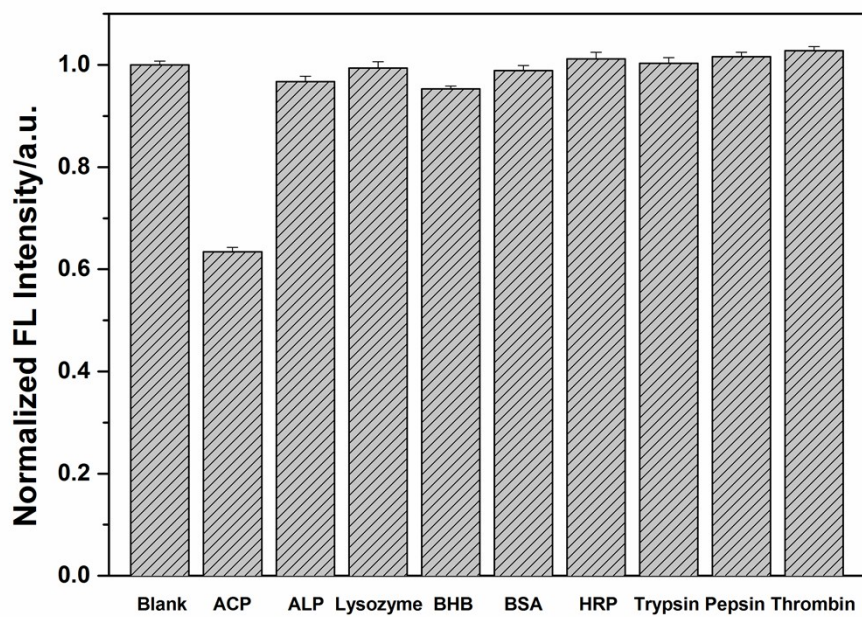

Fig. S5 The fluorescence intensity of GQDs-PDDA-( $\text{NaPO}_3$ )<sub>6</sub> system in the presence of 420 nU  $\text{mL}^{-1}$  ACP and other 8 common proteins, including alkaline phosphatase (ALP), lysozyme, bovine hemoglobin (BHB), bovine serum albumin (BSA), horseradish peroxidase (HRP), trypsin, pepsin and thrombin.

Table S2 The interference of coexisting ions on the detection of ACP (300 nU mL<sup>-1</sup>)

| Coexisting substances             | Tolerable concentration (μmol mL <sup>-1</sup> ) | ΔF/F (%) |
|-----------------------------------|--------------------------------------------------|----------|
| NaCl                              | 10.00                                            | 1.46     |
| KCl                               | 10.00                                            | 1.58     |
| MgCl <sub>2</sub>                 | 10.00                                            | 2.72     |
| Zn(NO <sub>3</sub> ) <sub>2</sub> | 10.00                                            | 2.06     |
| Ca(NO <sub>3</sub> ) <sub>2</sub> | 10.00                                            | 3.17     |
| Na <sub>3</sub> PO <sub>4</sub>   | 10.00                                            | 3.66     |
| Na <sub>2</sub> HPO <sub>4</sub>  | 10.00                                            | 3.13     |
| NaH <sub>2</sub> PO <sub>4</sub>  | 10.00                                            | 3.26     |
| FeCl <sub>3</sub>                 | 0.10                                             | -4.77    |
| FeCl <sub>2</sub>                 | 2.00                                             | -2.36    |

$\Delta F/F = F_0 - F$ , where  $F_0$  and  $F$  are the fluorescence intensities of the PDDA-GQDs-(NaPO<sub>3</sub>)<sub>6</sub>-ACP system in absence and presence of interfering ions.
